# Supplementary material
Source: PubMed Central journal article supplement (PMC2873148)

**Appendix Data for Wheeler, Heidenreich, Froelicher, Hlatky, and Ashley “Cost effectiveness of pre-participation screening for prevention of sudden cardiac death in young athletes”**

**Appendix Table 1. Assumptions**

|                              |          |          | Low CI     | High CI    |          |
|------------------------------|----------|----------|------------|------------|----------|
| <i>Baseline Medical Cost</i> | Base     | Low      | for        | for        | High     |
| <i>per Year</i>              | Case     | Estimate | Simulation | Simulation | estimate |
| Age 6-17                     | 1285(35) | 1000     | 1100       | 1400       | 1600     |
| Age 18-44                    | 2631(35) | 2200     | 2500       | 2800       | 3000     |
| Age 45-64                    | 5224(35) | 4400     | 5100       | 5300       | 6000     |
| Age 65+                      | 8906(35) | 7800     | 8500       | 9500       | 10000    |
| <b>Utilities</b>             |          |          |            |            |          |
| Athlete                      | 0.94(49) | 0.87     | 0.93       | 0.95       | 1        |
| Secondary Screen –           | 0.939*   | 0.87     | 0.929      | 0.949      | 1        |
| Year 1                       |          |          |            |            |          |
| Non-Athlete                  | 0.94*    | 0.87     | 0.93       | 0.95       | 1        |
| Heart disease –              | 0.89(49) | 0.76     | 0.85       | 0.93       | 1        |
| Newly diagnosed              |          |          |            |            |          |
| Heart disease – after        | 0.94*    | 0.76     | 0.93       | 0.95       | 1        |
| diagnosis year 4 on          |          |          |            |            |          |
| False Negative,              | 0.94*    | 0.90     | 0.93       | 0.95       | 1        |
| Disease not Discovered       |          |          |            |            |          |

**Appendix Table 1, Cont'd.**  
**Test Characteristics**

|                       |    |             |      |      |     |
|-----------------------|----|-------------|------|------|-----|
| ECG alone Sensitivity | 40 | 10 (27)     | 25   | 45   | 65  |
| ECG alone Specificity | 98 | 61.5 (27)** | 95.2 | 98.8 | 99  |
| ECG alone Cost        | 34 | 5           | 25   | 65   | 304 |

**Miscellaneous**

|                        |          |         |         |         |          |
|------------------------|----------|---------|---------|---------|----------|
| Max. Life span         | 100*     |         |         |         |          |
| Age at screening       | 16*      | 12      | 14      | 18      | 22       |
| Years of Extra Risk    | 8*       | 3       | 5       | 10      | 15       |
| Annual Discount Rate   | 0.03(60) | 0.00    | 0.025   | 0.04    | 0.07     |
| Probability Heart      | 0.01*§   | 0.001   | 0.008   | 0.012   | 0.075    |
| Disease Discovery in   |          |         |         |         |          |
| Primary False Negative |          |         |         |         |          |
| per year               |          |         |         |         |          |
| Number of athletes     | 3700000† | 1000000 | 2000000 | 5000000 | 20000000 |
| screened#              |          |         |         |         |          |

**Appendix Table 1, Cont'd.**

| <b>Prevalence (%)</b>                              |              |            |          |
|----------------------------------------------------|--------------|------------|----------|
| Hypertrophic Cardiomyopathy                        | 0.2(61)      | 0.003(62)  | 0.3(63)  |
| Anomalous Coronary Anatomy                         | 0.2(64)      | 0.05(65)   | 1.3(66)  |
| Left Ventricular Hypertrophy                       | 1.7(67)      | 1          | 8(43)    |
| Myocarditis                                        | 0.05(68)     | 0.0015(68) | 0.1      |
| Aortic Aneurysm                                    | 0.01*        | 0.005      | 0.13(30) |
| Arrhythmogenic Right Ventricular<br>Cardiomyopathy | 0.02(69)     | 0.01       | 0.05     |
| Premature Coronary Artery Disease                  | 0.1(70)      | 0.005      | 5(70)    |
| Dilated Cardiomyopathy                             | 0.05(71)     | 0.003(62)  | 0.2(72)  |
| Mitral Stenosis                                    | 0.06(73)     | 0.03       | 0.1      |
| Long QT                                            | 0.02(74)     | 0.01       | 0.06     |
| Mitral Valve Prolapse                              | 1.3(30)      | 0.34(73)   | 5(29)    |
| Brugada                                            | 0.06(75, 76) | 0.02(77)   | 0.6(78)  |
| Wolfe-Parkinson-White                              | 0.2(79, 80)  | 0.05       | 0.4      |
| Pulmonary Arterial Hypertension                    | 0.0003(81)   | 0.0001(82) | 0.003    |
| Marfan                                             | 0.02(83)     | 0.005(84)  | 0.03(83) |
| Coarctation                                        | 0.025(85)    | 0.017(86)  | 0.04     |
| Bicuspid Aortic Valve                              | 0.25(73)     | 0.1        | 0.5      |

\* Author consensus estimates †Based on number of sports participants in high-risk sports divided by average number of sports per athlete for high school and college athletes (5, 87,88). \*\* ECG alone using mildly abnormal ECG findings as positive initial screening

(44). § Disease discovery in Primary Testing False Negative in base case is 10fold more frequent than in the Secondary Testing False Negative group, as the Secondary Testing False Negative will be less likely to have readily discoverable disease if disease is not demonstrated on secondary testing, while there is a substantial proportion of individuals with underlying disease in the Primary Testing False Negative group who have disease easily discovered by echocardiography or other imaging technologies. # Not included in probabilistic sensitivity analyses. Probability distributions for probabilistic sensitivity analyses were defined with the base case as the median input and the low and high estimates of the median set as the 95% confidence interval limits of two one-sided normal distributions, with all values limited to positive numbers (or values between 0 and 1 for utilities and test characteristics). CI: confidence interval.

**Appendix Table 2 – Cost Effectiveness Ratios Using Relative Risk as Multipliers of the Baseline Risk of Death\***

In the base case we used conservative estimates for the propagation of risk associated with discovered underlying heart disease through screening, by reducing the risk of death to the background population risk after the age of thirty-five. In this sensitivity analysis, we used the ratio of the risk of death due to the presence of underlying heart disease to that for those without underlying heart disease as a multiplier in comparison to the baseline, actuarial yearly risk of death. In this analysis, as subjects with underlying heart disease age in the model, their risk of sudden cardiac death becomes substantially larger than those of unaffected contemporaries or those in the base-case model.

| Screening Method | Recommended to undergo secondary testing, number of athletes | Identified at increased risk of sudden death, number of athletes | Athletic sudden deaths, cases* | Life Years saved (discounted years) | Life Years Saved per 1000 athletes, discounted years | Total incremental cost versus no screening, discounted \$ millions | Discounted cost per Athlete | Incremental Cost-Effectiveness Ratio compared to no screening (\$/Life Year Saved) | Incremental Cost-Effectiveness Ratio, Compared with next cheaper Non-dominated strategy | Incremental Cost-Effectiveness Ratio Quality adjusted (Discounted \$/Quality Adjusted Life Year Saved) |
|------------------|--------------------------------------------------------------|------------------------------------------------------------------|--------------------------------|-------------------------------------|------------------------------------------------------|--------------------------------------------------------------------|-----------------------------|------------------------------------------------------------------------------------|-----------------------------------------------------------------------------------------|--------------------------------------------------------------------------------------------------------|
| No screening     |                                                              |                                                                  | 1070                           |                                     |                                                      |                                                                    |                             |                                                                                    | Cheapest                                                                                |                                                                                                        |
| ECG alone        | 73,100                                                       | 17,700                                                           | 818                            | 10200                               | 2.8                                                  | \$328                                                              | \$89                        | \$32,200                                                                           | \$32,200                                                                                | \$40,300                                                                                               |
| H&P              | 110,000                                                      | 6700                                                             | 980                            | 3730                                | 1                                                    | \$422                                                              | \$114                       | \$113,000                                                                          | Dominated                                                                               | Dominated                                                                                              |
| ECG plus H&P     | 180,000                                                      | 30,200                                                           | 650                            | 17250                               | 1.90                                                 | \$794                                                              | \$215                       | \$46,000                                                                           | \$65,500                                                                                | \$83,600                                                                                               |

\* Multiplicative model assumes having underlying heart disease increases the relative risk of death above baseline throughout the individual's lifetime. Hazard ratios of 0.997 for individuals without heart disease, 1.61 for individuals with undiscovered heart disease, and 1.30 for individuals with discovered heart disease were multiplied by the

baseline actuarial rate of death at each age until the age of 99. These ratios are derived from the ratio of the risk of SCD in non-athletes with occult cardiovascular abnormalities or diagnosed cardiovascular disease (9) to the incidence of any cause of death at age 24 (89) (at completion of competitive athletic activity for most individuals). The average life expectancy for athletes with heart disease in this model is 56.8 years from the time of screening versus 61.93 years for those without underlying heart disease.

**Appendix Table 3 – Probabilistic Sensitivity Analysis**

| Baseline  | Comparator  | Simulation 95% CI, Comparator False Positives | Simulation 95% CI, Comparator True Positives | Total Incremental Cost (mean of 10000 simulations, millions) | Simulation Mean (Median), ICER, \$/LY | Simulation 95% CI, ICER, \$/LY         | Simulation Median‡, ICER, \$/QALY | Simulation 95% CI, ICER, \$/QALY           |
|-----------|-------------|-----------------------------------------------|----------------------------------------------|--------------------------------------------------------------|---------------------------------------|----------------------------------------|-----------------------------------|--------------------------------------------|
| No screen | ECG         | 44,300-172,000                                | 10,800-21,500                                | \$319                                                        | \$65,100<br>(\$62,100)                | \$43,900-<br>\$102,100                 | \$94,600                          | \$24,400-<br>dominated*                    |
| No screen | H&P         | 74,400-290,100                                | 3,500-11,300                                 | \$433                                                        | \$241,000<br>(\$223,000)              | \$153,000-<br>\$412,000                | \$381,000                         | \$85,300-<br>QALY<br>dominated*            |
| No screen | ECG+<br>H&P | 112,000-255,000                               | 21,400-35,700                                | \$733                                                        | \$87,600<br>(\$84,700)                | \$62,400-<br>130,000                   | \$130,000                         | \$58,800-<br>QALY<br>dominated*            |
| H&P       | ECG         | 44,300-172,000                                | 10,800-21,500                                | Cost Saving<br>(-\$115)                                      | Cost and<br>life saving               | Cost and<br>life<br>saving-<br>\$1,520 | Cost and<br>QALY<br>saving        | Cost and<br>QALY<br>saving -<br>dominated* |
| H&P       | ECG+<br>H&P | 112,000-255,000                               | 21,400-35,700                                | \$302                                                        | \$45,700<br>(\$45,200)                | \$21,200-<br>\$71,300                  | \$66,200                          | \$15,300-<br>dominated*                    |
| ECG       | ECG+<br>H&P | 112,000-255,000                               | 21,400-35,700                                | \$414                                                        | \$122,000<br>(\$117,000)              | \$79,600-<br>\$233,200                 | \$190,000                         | \$44,200-<br>dominated*                    |

Simulations were run as pairwise comparisons, ignoring dominance and weak dominance. ‡Simulation median given as mean not meaningful due to proportion of QALY costing simulations. \*Due to significant effect of changes in utilities varied over the estimated range, incremental cost effectiveness ratios for each methodology were dominated versus all strategies with a decrease in QALY in a substantial fraction of

simulations. Comparator was found to be QALY costing in 24% of simulations (ECG alone vs no screening), 28% of simulations (H&P vs no screening), 21% of simulations (ECG alone vs H&P), 25% of simulations (ECG plus H&P vs ECG alone), 25% of simulations (ECG plus H&P vs. no screening), 23% of simulations (ECG plus H&P vs H&P). Abbreviations: ICER, incremental cost effectiveness ratio; LY, life years saved; CI, confidence interval; QALY, quality adjusted life years; H&P, cardiovascular focused history and physical; ECG + H&P, 12-lead electrocardiogram plus cardiovascular focused history and physical; ECG, 12-lead electrocardiogram.

Appendix Table 4A. Comparison of cost effectiveness of different screening methods for reducing sudden death in young athletes.

| Screening Method | Screening Method Sensitivity | Screening Method Specificity | Reference | Criteria                                         | False Positive, # | Number Identified as High Risk, Year One* | Life Years Saved per 1000 Athletes | Discounted Life Years Saved per 1000 Athletes | Total Cost (millions) | Cost (per athlete) | Discounted Cost (per athlete) | Discounted \$/Life Year Saved | Discounted \$/QALY | Incremental cost per athlete* | Incremental Life Years Saved/1000 athletes | Incremental Cost-Effectiveness Ratio, Versus next cheaper Non-dominated strategy |
|------------------|------------------------------|------------------------------|-----------|--------------------------------------------------|-------------------|-------------------------------------------|------------------------------------|-----------------------------------------------|-----------------------|--------------------|-------------------------------|-------------------------------|--------------------|-------------------------------|--------------------------------------------|----------------------------------------------------------------------------------|
| No screen        | 0%                           | 100%                         |           |                                                  |                   |                                           |                                    |                                               | \$0                   |                    |                               |                               |                    |                               |                                            | Cheapest                                                                         |
| Family History   | 5%                           | 97.1%                        | 27        | unexplained death in young family member         | 106000            | 2200                                      | 0.40                               | 0.16                                          | \$166                 | \$65               | \$45                          | \$274,900                     | \$559,000          |                               |                                            | Weakly dominated                                                                 |
| ECG alone        | 25%                          | 98.8%                        | 27        | ECG abnormal                                     | 43900             | 11100                                     | 2.43                               | 0.97                                          | \$230                 | \$74               | \$62                          | \$64,000                      | \$92,300           |                               |                                            | Weakly dominated                                                                 |
| ECG alone        | 40%                          | 98.0%                        | 51        | ECG abnormal                                     | 73100             | 17760                                     | 3.89                               | 1.55                                          | \$295                 | \$100              | \$80                          | \$51,400                      | \$74,200           | \$80                          | 1.55                                       | \$51,400                                                                         |
| ECG alone        | 45%                          | 95.2%                        | 44        | markedly abnormal elite athletes                 | 175500            | 19980                                     | 4.29                               | 1.72                                          | \$402                 | \$148              | \$109                         | \$63,400                      | \$94,000           |                               |                                            | Weakly dominated                                                                 |
| CV H&P           | 15%                          | 97.0%                        |           | base case                                        | 109700            | 6660                                      | 1.39                               | 0.56                                          | \$410                 | \$133              | \$111                         | \$199,200                     | \$310,000          |                               |                                            | Dominated                                                                        |
| ECG+ history     | 25%                          | 97.5%                        | 27        | ECG abnormal, serious symptoms or family history | 91400             | 11100                                     | 2.39                               | 0.96                                          | \$544                 | \$168              | \$147                         | \$153,900                     | \$228,000          |                               |                                            | Dominated                                                                        |
| ECG alone        | 55%                          | 89.7%                        | 44        | distinctly abnormal, elite athletes              | 376500            | 24400                                     | 5.10                               | 2.05                                          | \$614                 | \$243              | \$166                         | \$81,100                      | \$125,000          |                               |                                            | Weakly dominated                                                                 |
| ECG+ H&P         | 68%                          | 95.0%                        |           | base case                                        | 182800            | 30200                                     | 6.56                               | 2.62                                          | \$737                 | \$244              | \$199                         | \$76,100                      | \$111,000          |                               |                                            | Weakly dominated                                                                 |
| ECG+ H&P         | 73%                          | 93.1%                        | 52        | ECG or H&P positive                              | 252200            | 32400                                     | 7.00                               | 2.79                                          | \$815                 | \$278              | \$220                         | \$78,800                      | \$116,000          |                               |                                            | Weakly dominated                                                                 |
| ECG+ H&P         | 34%                          | 84.7%                        | 26        | ECG or history positive                          | 559300            | 15100                                     | 2.86                               | 1.16                                          | \$1,001               | \$377              | \$270                         | \$232,500                     | \$425,000          |                               |                                            | Dominated                                                                        |
| CG+ H&P          | 90%                          | 84.9%                        | 13        | ECG plus H&P                                     | 552000            | 39960                                     | 8.41                               | 3.37                                          | \$1,018               | \$390              | \$275                         | \$81,600                      | \$125,000          | \$195                         | 1.82                                       | \$107,000                                                                        |
| Family History   | 5%                           | 70.1%                        | 27        | any heart disease in family member               | 1093000           | 2200                                      | -0.49                              | -0.14                                         | \$1,080               | \$489              | \$292                         | Net life costing              | Dominated          |                               |                                            | Dominated                                                                        |
| ECG alone        | 75%                          | 61.5%                        | 44        | mildly abnormal, elite athletes                  | 1407000           | 33300                                     | 6.16                               | 2.51                                          | \$1,621               | \$704              | \$438                         | \$174,400                     | \$335,000          |                               |                                            | Dominated                                                                        |
| ECG alone        | 85%                          | 35.0%                        | 27        | LVH by isolated Sokolow-Lyon                     | 2376000           | 37700                                     | 6.28                               | 2.60                                          | \$2,545               | \$1,129            | \$688                         | \$264,200                     | \$655,000          |                               |                                            | Dominated                                                                        |

Appendix Table 4 Footnotes. Note that the validity of comparison among strategies may be limited as the test characteristics derived or estimated from the cited publications may not be fully applicable to the population utilized for the model nor reproducible in wide clinical practice. \*Cost versus next cheaper, non-dominated strategy. Dominated strategies are those that are more expensive and less effective than cheaper strategies. Weakly dominated strategies are those that are incrementally less cost-effective per life year saved than more costly strategies, such that a combination of the more expensive and less expensive non-dominated strategies would be preferable to use of the weakly dominated strategy.

Appendix Table 4B. Comparison of cost effectiveness of different screening methods for reducing sudden cardiac death in young athletes using cardiovascular history and physical as baseline comparator.

| Screening Method | Screening Method Sensitivity | Screening Method Specificity | Reference | Criteria                                         | False Positive, # | Number Identified as High Risk, Year One* | Life Years Saved per 1000 Athletes | Discounted Life Years Saved per 1000 Athletes | Total Cost (millions) | Discounted Cost (per athlete) | Discounted \$/Life Year Saved | Discounted \$/QALY | Incremental cost per athlete* | Incremental Effectiveness (Life Years Saved per 1000 athletes) | Incremental Cost-Effectiveness Ratio, Compared with next cheaper Non-dominated strategy |
|------------------|------------------------------|------------------------------|-----------|--------------------------------------------------|-------------------|-------------------------------------------|------------------------------------|-----------------------------------------------|-----------------------|-------------------------------|-------------------------------|--------------------|-------------------------------|----------------------------------------------------------------|-----------------------------------------------------------------------------------------|
| CV H&P           | 15%                          | 97.0%                        |           | Base Case                                        |                   |                                           |                                    |                                               |                       |                               |                               |                    |                               |                                                                |                                                                                         |
| ECG plus history | 25%                          | 97.5%                        | 27        | ECG abnormal, serious symptoms or family history | -18278            | 4440                                      | 1.01                               | 0.40                                          | \$134                 | \$36                          | \$90,800                      | \$125,000          |                               |                                                                | Weakly dominated                                                                        |
| ECG plus H&P     | 68%                          | 95%                          |           | Base case                                        | 73112             | 23532                                     | 5.18                               | 2.06                                          | \$328                 | \$89                          | \$42,900                      | \$61,600           | \$89                          | 2.06                                                           | \$42,900                                                                                |
| ECG plus H&P     | 73%                          | 93.1%                        | 52        | ECG or H&P positive                              | 142568            | 25752                                     | 5.61                               | 2.24                                          | \$405                 | \$109                         | \$48,900                      | \$71,100           |                               |                                                                | Weakly dominated                                                                        |
| ECG plus H&P     | 34%                          | 84.7%                        | 26        | ECG or history positive                          | 449639            | 8436                                      | 1.48                               | 0.61                                          | \$591                 | \$160                         | \$263,000                     | \$571,000          |                               |                                                                | Dominated                                                                               |
| ECG plus H&P     | 90%                          | 84.9%                        | 13        | ECG plus H&P                                     | 442327            | 33300                                     | 7.02                               | 2.81                                          | \$607                 | \$164                         | \$58,356                      | \$310,000          | \$75                          | 0.75                                                           | \$101,000                                                                               |

Note that the validity of comparison among strategies may be limited as the test characteristics derived or estimated from the cited publications may not be fully applicable to the model nor reproducible in wide clinical practice. \*Cost versus next cheaper, non-dominated strategy. Dominated strategies are those that are more expensive and less effective than cheaper strategies. Weakly dominated strategies are those that are incrementally less cost-effective per life year saved than more costly strategies, such that a combination of the more expensive and less expensive non-dominated strategies would be preferable to use of the weakly dominated strategy.

Appendix Table 5A. Comparison of screening modalities assuming 36th Bethesda Conference parameters or Base Case Parameters. Effects of multiple testing, repeat follow up testing, and screened population size.

| Screening Method                                                                                             | Sensitivity | Specificity | Total Incremental Cost (discounted Millions) | Per athlete incremental Cost (non-discounted) | Per athlete incremental Discounted Cost | Life Years Saved per 1000 Athletes | Discounted Life Years Saved per 1000 Athletes | Incremental Cost-effectiveness Ratio (Discounted \$/Life Year Saved) | False Positive Tests, # | Number Identified as High Risk, Year One† |
|--------------------------------------------------------------------------------------------------------------|-------------|-------------|----------------------------------------------|-----------------------------------------------|-----------------------------------------|------------------------------------|-----------------------------------------------|----------------------------------------------------------------------|-------------------------|-------------------------------------------|
| Statement Assumptions, 10 million Screened, Single Screen per Athlete                                        |             |             |                                              |                                               |                                         |                                    |                                               |                                                                      |                         |                                           |
| CV H&P Base case                                                                                             | 15%         | 97%         | \$970                                        | \$108                                         | \$97                                    | 0.29                               | 0.13                                          | \$757,000*                                                           | 299700                  | 1500                                      |
| ECG plus H&P base                                                                                            | 68%         | 95%         | \$1,510                                      | \$174                                         | \$151                                   | 2.02                               | 0.83                                          | \$183,000                                                            | 499500                  | 6800                                      |
| ECG plus H&P (13)                                                                                            | 90%         | 85%         | \$1,960                                      | \$252                                         | \$196                                   | 1.97                               | 0.85                                          | \$230,000*                                                           | 1498500                 | 9000                                      |
| Base Case Assumptions 3.7 million Screened Yearly Screen per Athlete, Recurring Follow-up Testing Costs      |             |             |                                              |                                               |                                         |                                    |                                               |                                                                      |                         |                                           |
| CV H&P Yearly                                                                                                | 15%         | 97%         | \$2,780                                      | \$862                                         | \$751                                   | 1.39                               | 0.56                                          | \$1,350,000*                                                         | 880000                  | 6600                                      |
| ECG plus H&P, Yearly                                                                                         | 68%         | 95%         | \$4,380                                      | \$1,366                                       | \$1,184                                 | 6.56                               | 2.62                                          | \$452,100                                                            | 1464000                 | 30200                                     |
| Statement Assumptions, 10 million Screened, Yearly Screen per Athlete, Recurring Follow-up Testing Costs     |             |             |                                              |                                               |                                         |                                    |                                               |                                                                      |                         |                                           |
| CV H&P Yearly                                                                                                | 15%         | 97%         | \$7,320                                      | \$831                                         | \$732                                   | 0.29                               | 0.13                                          | \$5,717,000*                                                         | 2397600                 | 1500                                      |
| ECG plus H&P, Yearly                                                                                         | 90%         | 85%         | \$13,300                                     | \$1,549                                       | \$1,334                                 | 1.97                               | 0.85                                          | \$1,563,000                                                          | 11988000                | 9000                                      |
| Base Case Assumptions, 3.7 million Screened, Yearly Screen per Athlete, No Recurring Follow-up Testing Costs |             |             |                                              |                                               |                                         |                                    |                                               |                                                                      |                         |                                           |
| CV H&P, Yearly                                                                                               | 15%         | 97%         | \$2,300                                      | \$717                                         | \$623                                   | 1.39                               | 0.56                                          | \$1,121,000*                                                         | 880000                  | 6600                                      |
| ECG plus H&P, Yearly                                                                                         | 68%         | 95%         | \$3,500                                      | \$1,100                                       | \$950                                   | 6.56                               | 2.62                                          | \$363,000                                                            | 1464000                 | 30200                                     |
| Statement Assumptions, 10 million Screened, Yearly Screen per Athlete, No Recurring Follow-up Testing Costs  |             |             |                                              |                                               |                                         |                                    |                                               |                                                                      |                         |                                           |
| CV H&P, Yearly                                                                                               | 15%         | 97%         | \$6,090                                      | \$692                                         | \$609                                   | 0.29                               | 0.13                                          | \$4,760,000*                                                         | 2397600                 | 1500                                      |
| ECG plus H&P, Yearly                                                                                         | 90%         | 85%         | \$7,230                                      | \$853                                         | \$723                                   | 1.97                               | 0.85                                          | \$850,000                                                            | 11988000                | 9000                                      |

Comparator is no screening. \*Dominated strategy. † Number of athletes screened to be at high risk. In yearly screen analyses, only athletes identified at year one are included. Abbreviations: CV H&P, cardiovascular focused history and physical; ECG plus H&P, 12-lead electrocardiogram plus cardiovascular focused history and physical.

Appendix Table 5B. Comparison of screening modalities assuming 36th Bethesda Conference document parameters or Base Case Parameters, as compared to baseline of history and physical. Effects of multiple testing, repeat follow up testing, and screened population size.

| Screening Method                                                                                             | Comparator       | Sensitivity | Specificity | Total Incremental Cost (millions, discounted) | Incremental Life Years Saved per 1000 Athletes | Incremental Discounted Life Years Saved per 1000 Athletes | Incremental Cost per athlete, non-discounted | Incremental Discounted Cost per athlete | Difference in Discounted \$/Life Year Saved, Screening Method vs. Comparator | Difference in False Positive Test Results, # | Difference in Number Identified as High Risk, Year One† |
|--------------------------------------------------------------------------------------------------------------|------------------|-------------|-------------|-----------------------------------------------|------------------------------------------------|-----------------------------------------------------------|----------------------------------------------|-----------------------------------------|------------------------------------------------------------------------------|----------------------------------------------|---------------------------------------------------------|
| Statement Assumptions, 10 million Screened, Single Screen per Athlete                                        |                  |             |             |                                               |                                                |                                                           |                                              |                                         |                                                                              |                                              |                                                         |
| ECG plus H&P (13)                                                                                            | CV H&P Base case | 90%         | 85%         | \$990                                         | 1.69                                           | 0.73                                                      | \$144                                        | \$99                                    | \$136,400                                                                    | 1198800                                      | 7500                                                    |
| Base Case Assumptions 3.7 million Screened Yearly Screen per Athlete, Recurring Follow-up Testing Costs      |                  |             |             |                                               |                                                |                                                           |                                              |                                         |                                                                              |                                              |                                                         |
| ECG plus H&P Yearly                                                                                          | CV H&P, Yearly   | 68%         | 95%         | \$1,600                                       | 2.18                                           | 2.06                                                      | \$504                                        | \$433                                   | \$210,000                                                                    | 584000                                       | 23600                                                   |
| Statement Assumptions, 10 million Screened, Yearly Screen per Athlete, Recurring Follow-up Testing Costs     |                  |             |             |                                               |                                                |                                                           |                                              |                                         |                                                                              |                                              |                                                         |
| ECG plus H&P Yearly                                                                                          | CV H&P, Yearly   | 68%         | 95%         | \$3,760                                       | 1.73                                           | 0.69                                                      | \$434                                        | \$376                                   | \$539,300                                                                    | 1598400                                      | 5300                                                    |
| ECG plus H&P, Yearly                                                                                         | CV H&P, Yearly   | 90%         | 85%         | \$6,030                                       | 1.69                                           | 0.73                                                      | \$718                                        | \$603                                   | \$830,700                                                                    | 9590400                                      | 7500                                                    |
| Base Case Assumptions, 3.7 million Screened, Yearly Screen per Athlete, No Recurring Follow-up Testing Costs |                  |             |             |                                               |                                                |                                                           |                                              |                                         |                                                                              |                                              |                                                         |
| ECG plus H&P, Yearly                                                                                         | CV H&P, Yearly   | 68%         | 95%         | \$1,210                                       | 2.18                                           | 2.06                                                      | \$383                                        | \$327                                   | \$158,600                                                                    | 584000                                       | 23600                                                   |
| Statement Assumptions, 10 million Screened, Yearly Screen per Athlete, No Recurring Follow-up Testing Costs  |                  |             |             |                                               |                                                |                                                           |                                              |                                         |                                                                              |                                              |                                                         |
| ECG plus H&P, Yearly                                                                                         | CV H&P, Yearly   | 90%         | 85%         | \$1,140                                       | 1.69                                           | 0.73                                                      | \$161                                        | \$114                                   | \$157,400                                                                    | 1598400                                      | 7500                                                    |
| ECG plus H&P Yearly                                                                                          | CV H&P, Yearly   | 68%         | 95%         | \$2,930                                       | 1.73                                           | 0.69                                                      | \$339                                        | \$293                                   | \$420,000*                                                                   | 9590400                                      | 5300                                                    |

\*Dominated strategy. † Number of athletes screened to be at high risk. In yearly screen analyses, only athletes identified at year one are included. Abbreviations: CV H&P, cardiovascular focused history and physical; ECG plus H&P, 12-lead electrocardiogram plus cardiovascular focused history and physical.

## Appendix Figure Legends

Appendix Figure 1. Characteristics of the unscreened student athlete population. Student athletes harboring cardiac abnormalities placing them at potential increased risk for SCD. Numbers of athletes in at-risk athletic activities expected to have underlying cardiac abnormalities are listed next to chart labels. Total number of student athletes in at-risk activities estimated to be 3.7 million. Note that mitral valve prolapse and left ventricular hypertrophy do not carry similar risk of early death as compared to other findings in the population.

Appendix Figure 2. Expected prevalence and risk of sudden death per year in the young athlete population. (A) Expected frequencies of student-athletes harboring underlying cardiac abnormalities were calculated from figures for total student-athlete participants and prevalence of cardiac abnormalities in adolescent and young adult sampled populations (Appendix Table 1 for references). The number of athletes at risk was then divided by the number of athletes found to have SCD in registry data (13) to generate an estimated yearly risk for SCD by underlying diagnosis (B). Note that many athletes harboring potential causes of sudden cardiac death have comparatively low risk versus others. Sudden deaths in the left ventricular hypertrophy group are assumed to be due to subclinical forms of hypertrophic cardiomyopathy; those with mitral valve prolapse may be due to mechanical or arrhythmic causes. CAD, coronary artery disease; ARVC, arrhythmogenic right ventricular cardiomyopathy.

Appendix Figure 3. Cost effectiveness of screening athletes to prevent sudden cardiac death. Evaluation of different screening modalities and test characteristics derived from the athlete screening literature. Test modalities and reported test results were used as inputs in the model and compared to a strategy of no screening. The discounted incremental life years gained per 1000 athletes screened is plotted against the cost per athlete screened for each modality. The incremental cost effectiveness ratio, screening method, and threshold for a positive test results are shown together with the reference from which test characteristic estimates were derived. Note due to significant heterogeneity between the populations studied and methods used in the papers compared, the test characteristics derived from each study may not be entirely applicable to the screened population described for the base case. Additionally, the methods of family history, history, and physical are not uniform across the studies referenced. Number in parentheses is reference from which input estimates have been derived. Details of incremental cost-effectiveness ratio versus no screening for each study (references in parentheses) can be found in Appendix Table 4A; comparison to a baseline of history and physical for those including history can be found in Appendix Table 4B. Estimated test sensitivity and specificity for each graphed incremental cost effectiveness ratio is shown, derived from reference in parentheses. Incremental cost effectiveness ratios versus no screening are as follows: \$51,400 (40%,98%), \$63,400 (45%,95.2%), \$64,000 (25%,98.8%), \$76,100 (68%, 95%), \$78,800 (73%,93.1%), \$81,000 (55%,89.7%), \$81,600 (90%,84.9%), \$153,900 (25%,97.5%), \$174,000 (75%,61.5%), \$199,200 (15%,97%), \$232,500 (34%,84.7%), \$264,000 (85%,35%), \$275,000 (5%,97.1%); life

costing (5%,70.1%). LVH, left ventricular hypertrophy; ECG + history, 12-lead ECG and concerning or severe historical features; FH, family history.

Appendix Figure 4. Univariate sensitivity analyses for ECG strategies. The incremental cost-effectiveness ratios of (A) ECG alone versus no screening, (B) ECG plus cardiovascular focused history and physical versus ECG alone were compared by varying critical parameters through possible ranges. The comparison of ECG alone versus cardiovascular focused history and physical alone is not shown as the ECG alone strategy is dominant (costs less and is more effective) in all cases except when ECG specificity is low, ECG cost is more than \$65 and history and physical cost is less than \$42. For each graph, the base case estimates are shown (vertical lines). Horizontal solid boxes represent the incremental cost effectiveness ratio resulting from inputting the described variable over the expected range of the mean value (also used in probabilistic sensitivity analysis); horizontal lines represent incremental cost effectiveness ratio found using expected minimum and maximum inputs, which may be applicable to specific subgroups or to particular payors. The accompanying table lists, from left to right: the low value input, the low input used for probabilistic sensitivity analysis, the high value input used for probabilistic sensitivity analysis, and the high value input for each variable or combination of variables. Risk ratio, Athlete vs. DQ represents the ratio of risk reduction associated with disqualification and treatment of athletes with underlying occult heart disease. SN, sensitivity; SP, specificity. † ECG plus H&P cost and life saving versus comparator. \* Base case assumption.

Appendix Figure 5. Probabilistic sensitivity analysis results evaluating screening athletes using ECG alone versus other screening modalities. A) Scatter plot of life saving versus incremental increase in cost for each of 10,000 Monte Carlo simulations randomly varying each variable over estimated ranges (Table 1, Appendix Table 1 for inputs). ECG alone sensitivity of 40% and specificity of 98% based on data of Nora et al. (51) together with estimate of prevalence of screened athletes potentially at risk (Appendix Table 1). Lines representing willingness to pay threshold incremental cost effectiveness ratios of \$50,000 per life year and \$100,000 per life year are shown for comparison. Simulations with negative incremental cost are cost-saving versus the comparator. Average values and confidence intervals for incremental cost effectiveness ratios based on probabilistic simulations are shown in Appendix Table 3. B) Cost effectiveness acceptability curve, showing proportion of simulations below incremental cost effectiveness ratio at given values in discounted dollars per discounted life years saved. The probability of preferring ECG alone compared to no screening is 12.6% at a willingness to pay threshold of \$50,000 per life year and 97% at \$100,000 per life year. ECG alone is cost- and life-saving in more than 93.6% of simulations vs. H&P alone, and below \$50,000 per life year saved in more than 99.9% of simulations.

Appendix Figure 6. Effect of multiple testing on screening cost-effectiveness. As the primary analysis assumes a single episode of screening, yet current recommendation statements advise yearly or biannual screening, the effects of repeated screening for each methodology in terms of change in cost-effectiveness were modeled. Yearly screening cost (screening test plus secondary testing costs) are assumed to recur with each

additional year of screening, as an upper bound of cost of screening (see also Appendix Table 5). More conservative estimates regarding the cost of repeated screening in terms of reduction of repeated secondary testing costs may lead to costs intermediate between those shown and the base case estimate. Efficacy was assumed to be independent of number of tests, though the veracity of this assumption is not well known.

Appendix Figure 7. Sensitivity analysis of cost effectiveness of screening as a function of total student and student athlete number potentially at risk for sudden cardiac death, assuming constant number of athletic sudden cardiac deaths. A. Sensitivity analysis examining total number of athletes at risk versus cost-effectiveness ratio for ECG plus history and physical or cardiovascular focused history and physical, compared to no screening. Total number of athletic sudden cardiac deaths was assumed to be independent of the number screened for this analysis, however non-athletic death and background non-sudden cardiac death remained constant on a per individual basis for each risk group. 26 million students is the total middle school and high school age population in the United States (90). Ten million students is the estimated total school age population participating in any sports. 3.7 million students (base case) is the estimated total high school and college age population participating in high intensity, interscholastic and intercollegiate sport. B. Sensitivity analysis examining total number of athletes at risk versus incremental cost effectiveness ratio assuming underlying at risk heart disease prevalence of 0.1%; with proportionally higher yearly incidence of death in the high risk subgroups, modeled after the risk estimates in (13).

## References, Appendices

60. **Gold MR, Siegel, J.E., Russell, L.B., Weinstein, M.C., ed.** *Cost-effectiveness in health and medicine*. New York: Oxford University Press; 1996.
61. **Maron BJ, Gardin JM, Flack JM, Gidding SS, Kurosaki TT, Bild DE.**  
Prevalence of hypertrophic cardiomyopathy in a general population of young adults. Echocardiographic analysis of 4111 subjects in the CARDIA Study. Coronary Artery Risk Development in (Young) Adults. *Circulation*. 1995;92(4):785-9.
62. **Arola A, Jokinen E, Ruuskanen O, Saraste M, Pesonen E, Kuusela AL, et al.**  
Epidemiology of idiopathic cardiomyopathies in children and adolescents. A nationwide study in Finland. *Am J Epidemiol*. 1997;146(5):385-93.
63. **Agnarsson UT, Hardarson T, Hallgrimsson J, Sigfusson N.** The prevalence of hypertrophic cardiomyopathy in men: an echocardiographic population screening study with a review of death records. *J Intern Med*. 1992;232(6):499-506.
64. **Davis JA, Cecchin F, Jones TK, Portman MA.** Major coronary artery anomalies in a pediatric population: incidence and clinical importance. *J Am Coll Cardiol*. 2001;37(2):593-7.
65. **Pelliccia A, Spataro A, Maron BJ.** Prospective echocardiographic screening for coronary artery anomalies in 1,360 elite competitive athletes. *Am J Cardiol*. 1993;72(12):978-9.

66. **Yamanaka O, Hobbs RE.** Coronary artery anomalies in 126,595 patients undergoing coronary arteriography. *Cathet Cardiovasc Diagn.* 1990;21(1):28-40.
67. **Pelliccia A, Maron BJ, Spataro A, Proschan MA, Spirito P.** The upper limit of physiologic cardiac hypertrophy in highly trained elite athletes. *N Engl J Med.* 1991;324(5):295-301.
68. **Kyto V, Saraste A, Voipio-Pulkki LM, Saukko P.** Incidence of fatal myocarditis: a population-based study in Finland. *Am J Epidemiol.* 2007;165(5):570-4.
69. **Gemayel C, Pelliccia A, Thompson PD.** Arrhythmogenic right ventricular cardiomyopathy. *J Am Coll Cardiol.* 2001;38(7):1773-81.
70. **Joseph A, Ackerman D, Talley JD, Johnstone J, Kupersmith J.** Manifestations of coronary atherosclerosis in young trauma victims--an autopsy study. *J Am Coll Cardiol.* 1993;22(2):459-67.
71. **Lipshultz SE, Sleeper LA, Towbin JA, Lowe AM, Orav EJ, Cox GF, et al.** The incidence of pediatric cardiomyopathy in two regions of the United States. *N Engl J Med.* 2003;348(17):1647-55.
72. **Miura K, Nakagawa H, Morikawa Y, Sasayama S, Matsumori A, Hasegawa K, et al.** Epidemiology of idiopathic cardiomyopathy in Japan: results from a nationwide survey. *Heart.* 2002;87(2):126-30.
73. **Bar-Dayan Y, Elishkevits K, Goldstein L, Goldberg A, Ohana N, Onn E, et al.** The prevalence of common cardiovascular diseases among 17-year-old Israeli conscripts. *Cardiology.* 2005;104(1):6-9.

74. **Quaglini S, Rognoni C, Spazzolini C, Priori SG, Mannarino S, Schwartz PJ.** Cost-effectiveness of neonatal ECG screening for the long QT syndrome. *Eur Heart J*. 2006;27(15):1824-32.
75. **Blangy H, Sadoul N, Coutelour JM, Rebmann JP, Joseph M, Scherrer C, et al.** [Prevalence of Brugada syndrome among 35,309 inhabitants of Lorraine screened at a preventive medicine centre]. *Arch Mal Coeur Vaiss*. 2005;98(3):175-80.
76. **Gallagher MM, Forleo GB, Behr ER, Magliano G, De Luca L, Morgia V, et al.** Prevalence and significance of Brugada-type ECG in 12,012 apparently healthy European subjects. *Int J Cardiol*. 2007.
77. **Oe H, Takagi M, Tanaka A, Namba M, Nishibori Y, Nishida Y, et al.** Prevalence and clinical course of the juveniles with Brugada-type ECG in Japanese population. *Pacing Clin Electrophysiol*. 2005;28(6):549-54.
78. **Junttila MJ, Raatikainen MJ, Karjalainen J, Kauma H, Kesaniemi YA, Huikuri HV.** Prevalence and prognosis of subjects with Brugada-type ECG pattern in a young and middle-aged Finnish population. *Eur Heart J*. 2004;25(10):874-8.
79. **Vidaillet HJ, Jr., Pressley JC, Henke E, Harrell FE, Jr., German LD.** Familial occurrence of accessory atrioventricular pathways (preexcitation syndrome). *N Engl J Med*. 1987;317(2):65-9.
80. **Krahn AD, Manfreda J, Tate RB, Mathewson FA, Cuddy TE.** The natural history of electrocardiographic preexcitation in men. The Manitoba Follow-up Study. *Ann Intern Med*. 1992;116(6):456-60.

81. **Hyduk A, Croft JB, Ayala C, Zheng K, Zheng ZJ, Mensah GA.** Pulmonary hypertension surveillance--United States, 1980-2002. *MMWR Surveill Summ.* 2005;54(5):1-28.
82. **Rich S, Dantzker DR, Ayres SM, Bergofsky EH, Brundage BH, Detre KM, et al.** Primary pulmonary hypertension. A national prospective study. *Ann Intern Med.* 1987;107(2):216-23.
83. **Milewicz DM, Dietz HC, Miller DC.** Treatment of Aortic Disease in Patients With Marfan Syndrome. *Circulation.* 2005;111(11):e150-157.
84. **Pyeritz RE, McKusick VA.** The Marfan syndrome: diagnosis and management. *N Engl J Med.* 1979;300(14):772-7.
85. **Fixler DE, Pastor P, Chamberlin M, Sigman E, Eifler CW.** Trends in congenital heart disease in Dallas County births. 1971-1984. *Circulation.* 1990;81(1):137-42.
86. Report of the New England Regional Infant Cardiac Program. *Pediatrics.* 1980;65(2):377-461.
87. **National Federation of State High School Associations.** 2006-07 High School Athletics Participation Survey. Vol. 2008; 2008.
88. **National Collegiate Athletics Association.** 1981-82 - 2004-05 NCAA Sports Sponsorship and Participation Rates Report. Vol. 2008; 2007.
89. **Minino AM, Heron MP, Murphy SL, Kochanek KD.** Deaths: final data for 2004. *Natl Vital Stat Rep.* 2007;55(19):1-119.
90. **US Census Bureau.** Annual Estimates of the Resident Population by Sex and Selected Age Groups for the United States: April 1, 2000 to July 1, 2008. 2009.

Appendix Figure 1.

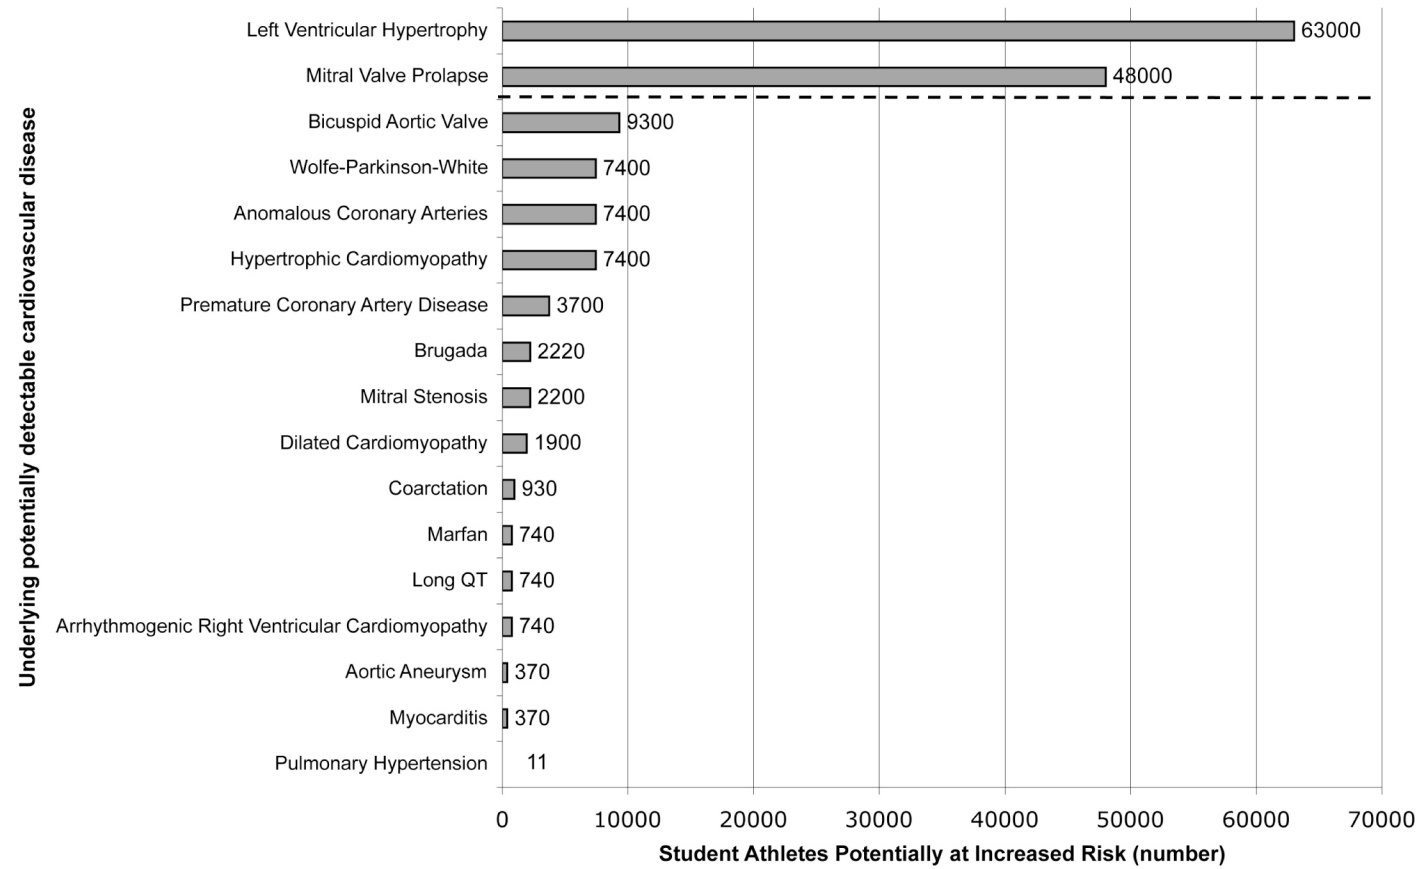

Appendix Figure 2.

A.

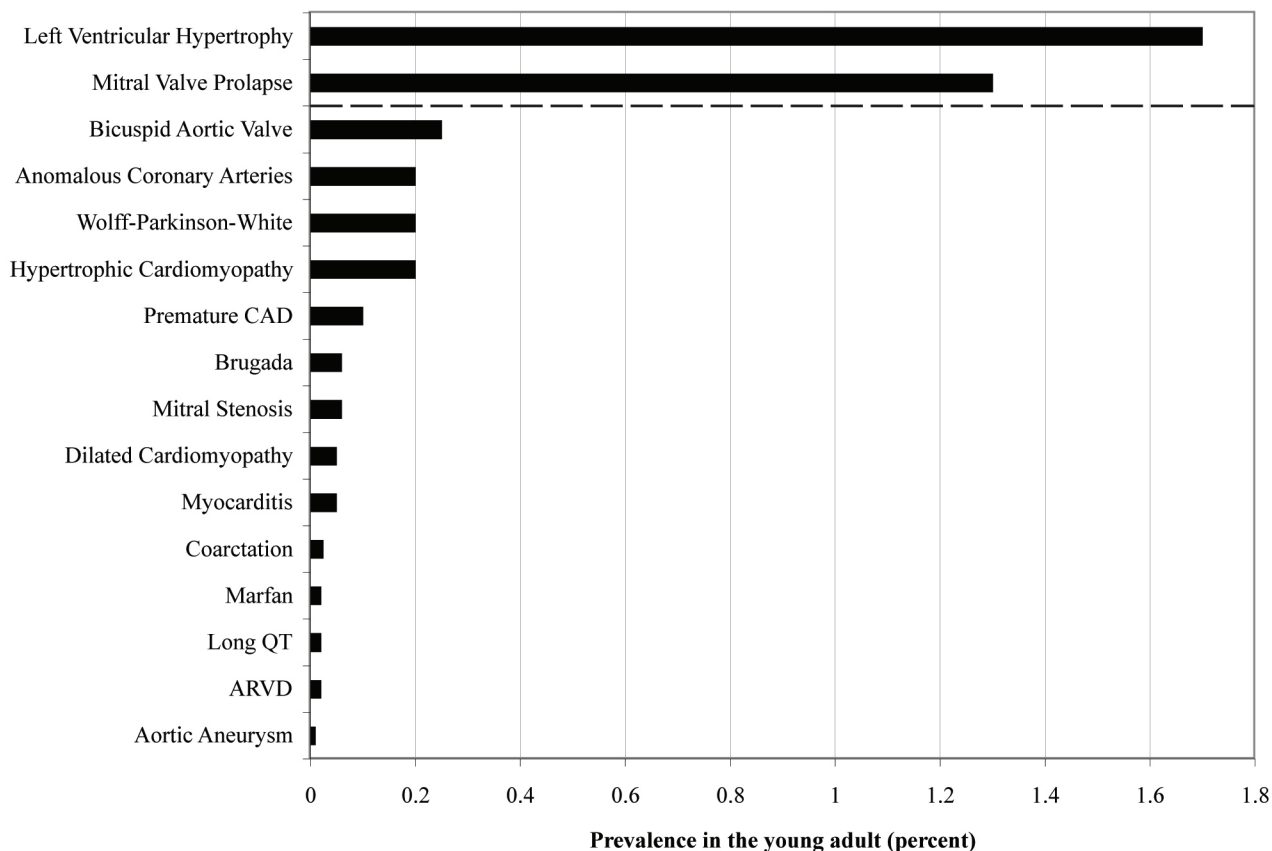

B.

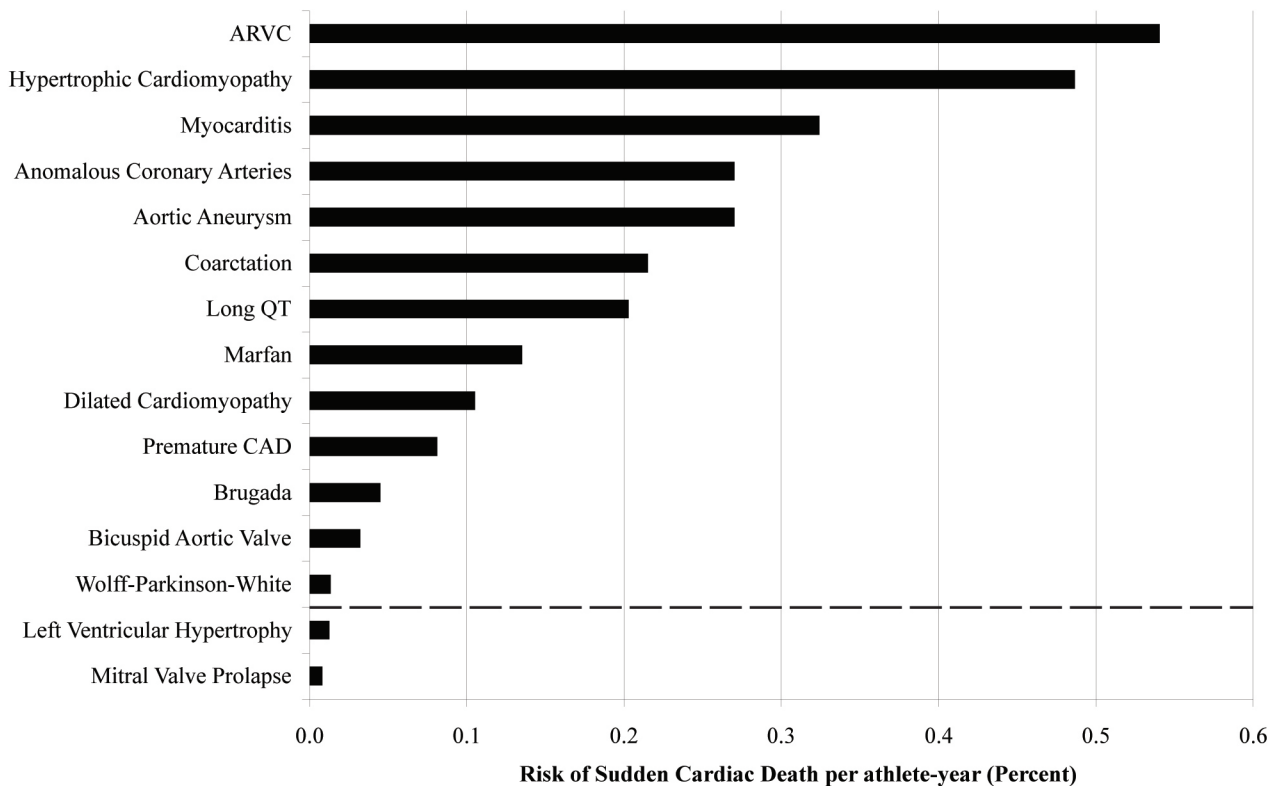

Appendix Figure 3.

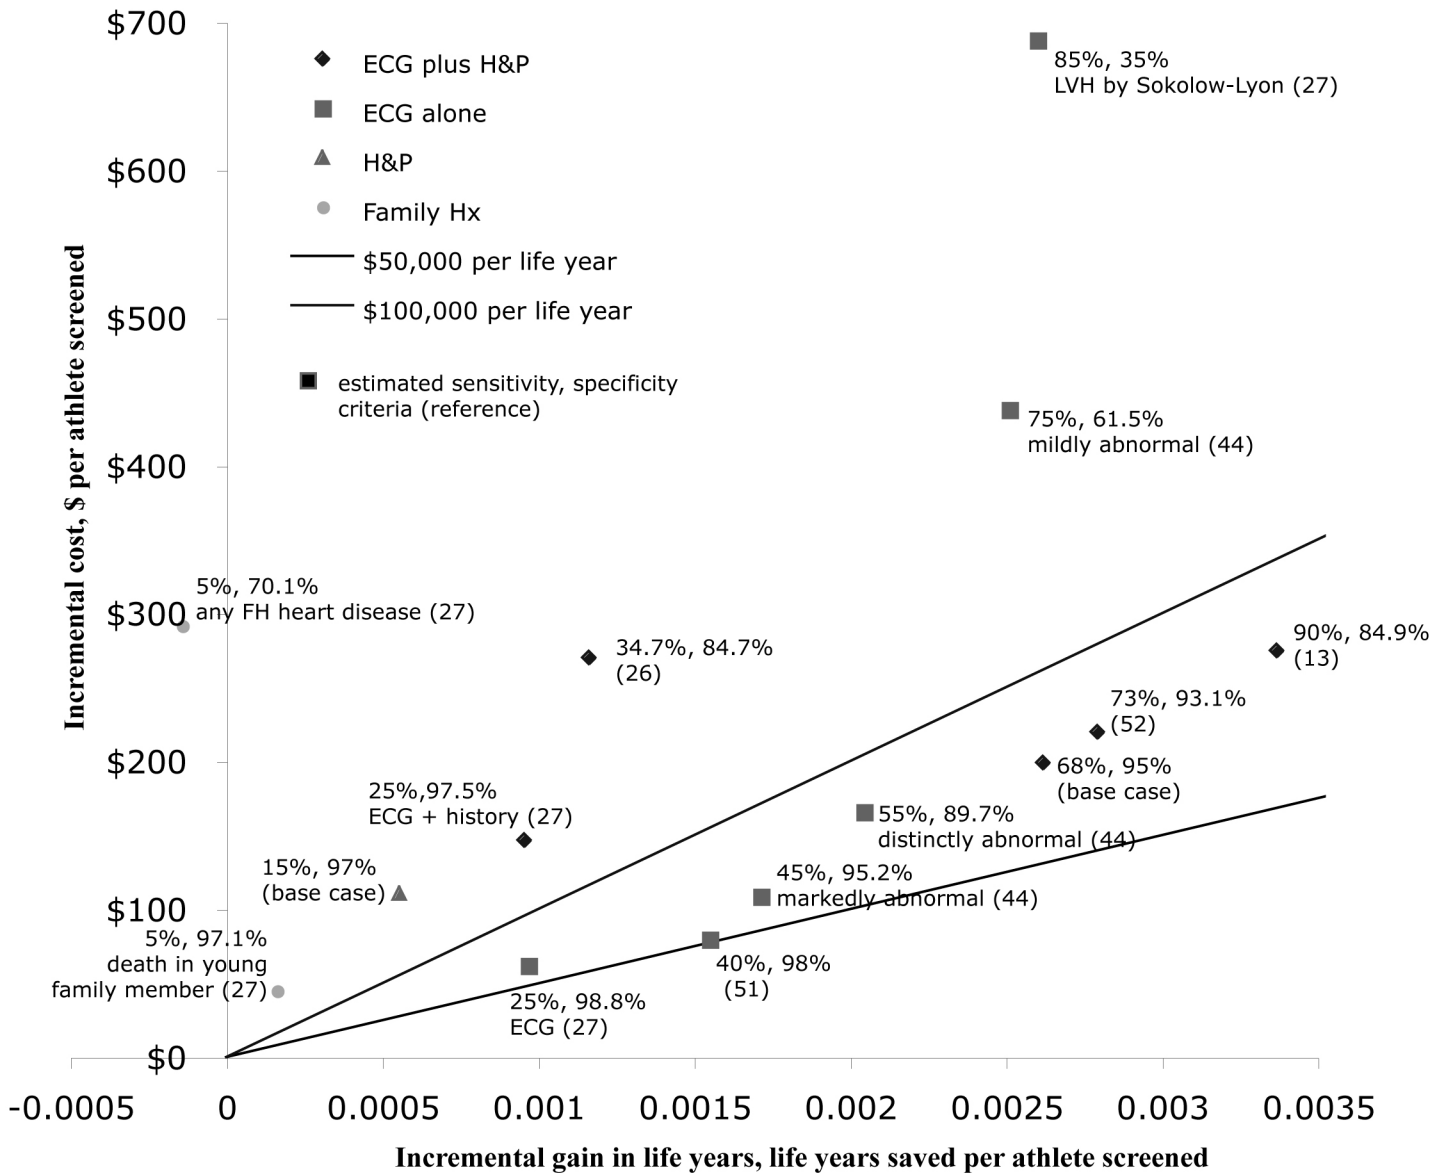

Appendix Figure 4.

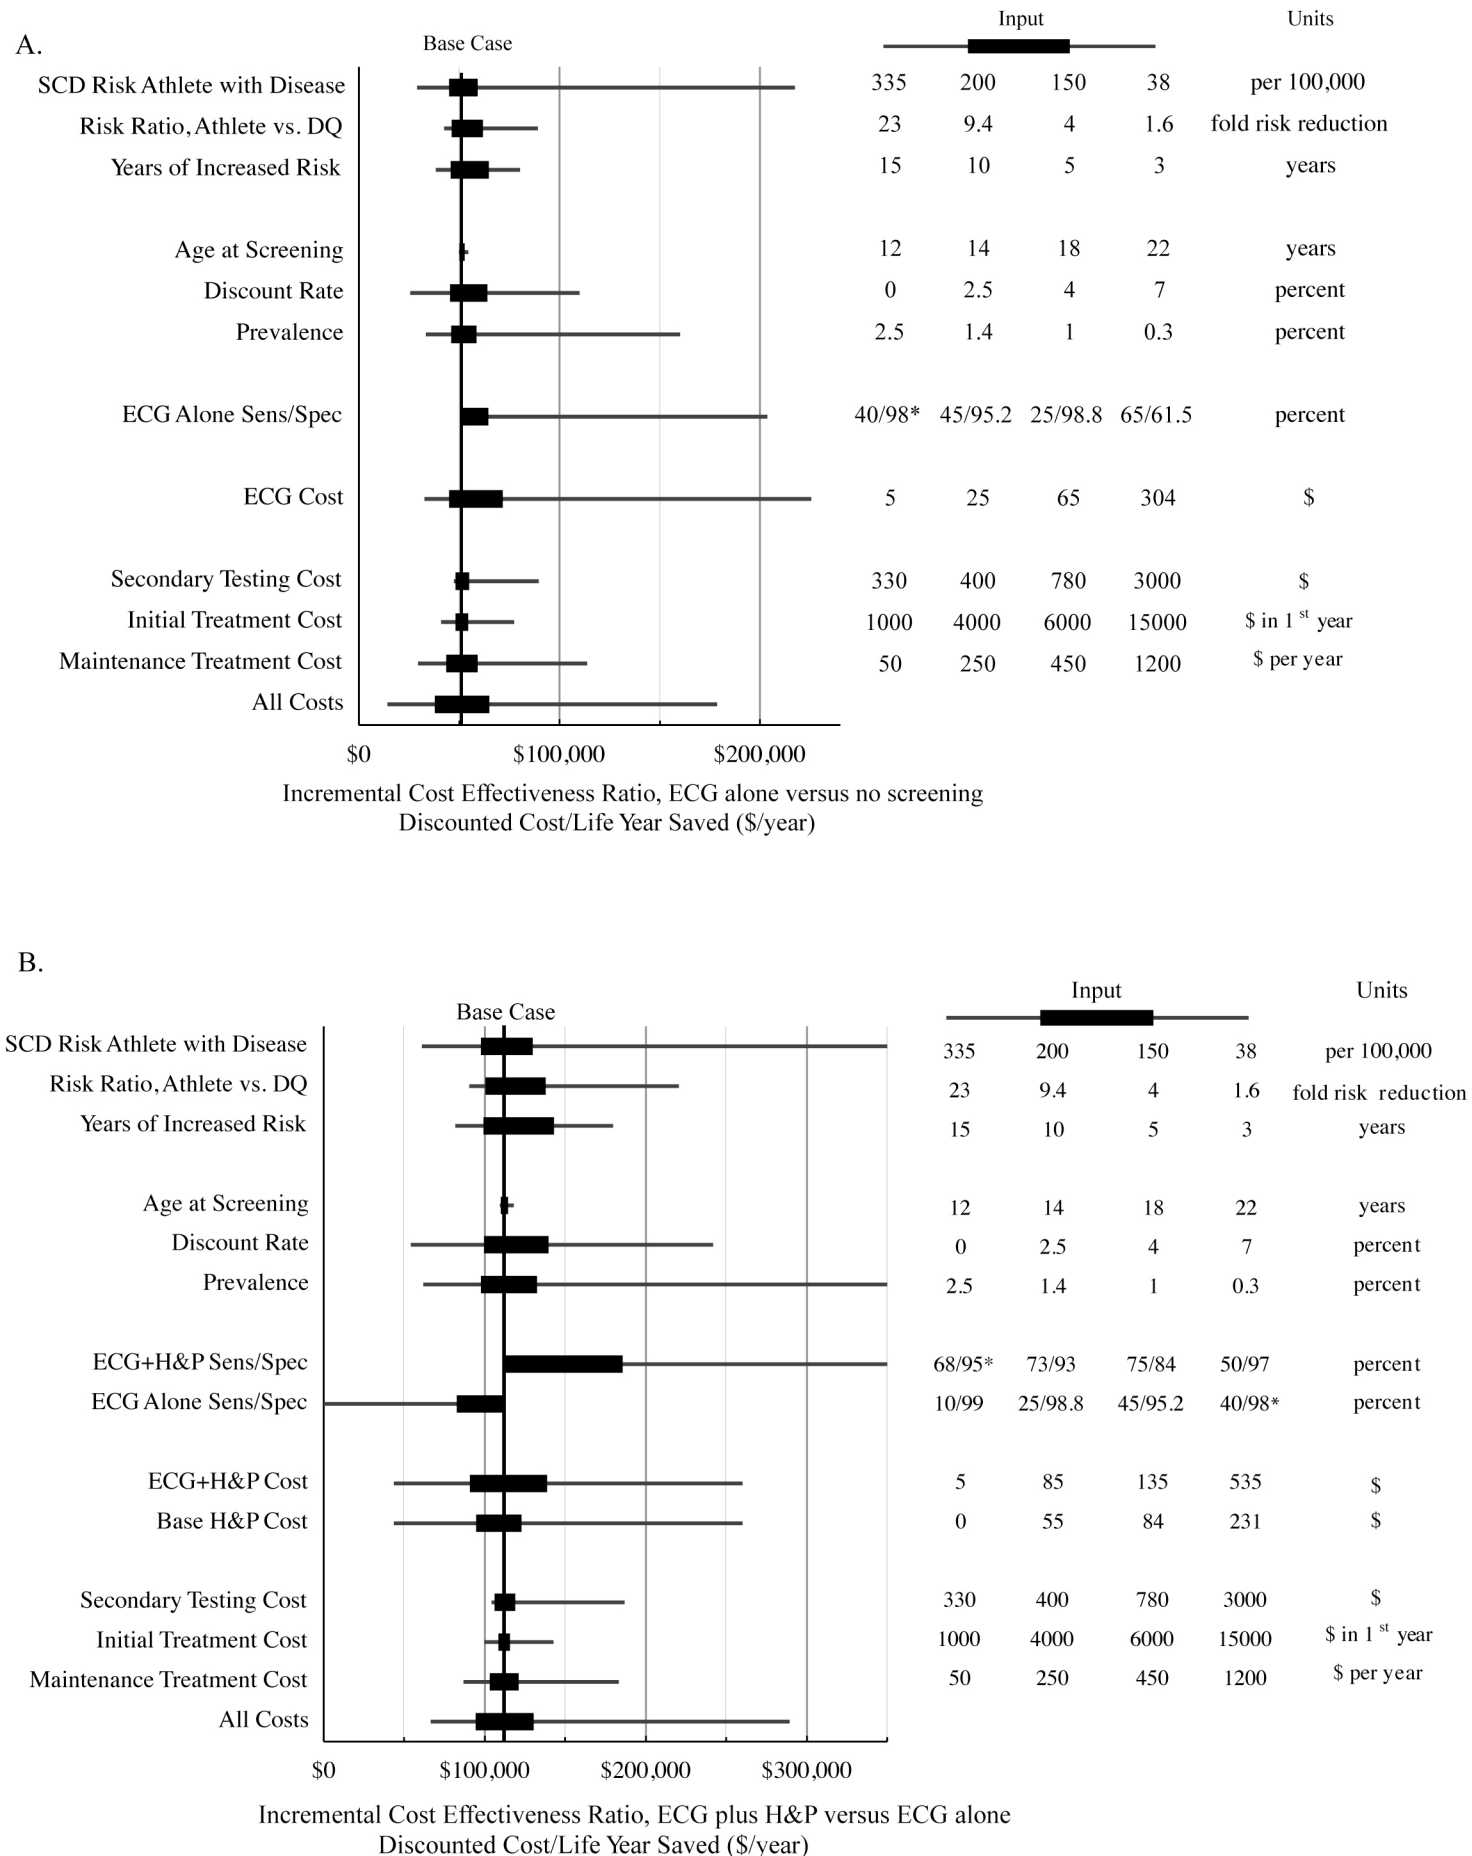

Appendix Figure 5.

A.

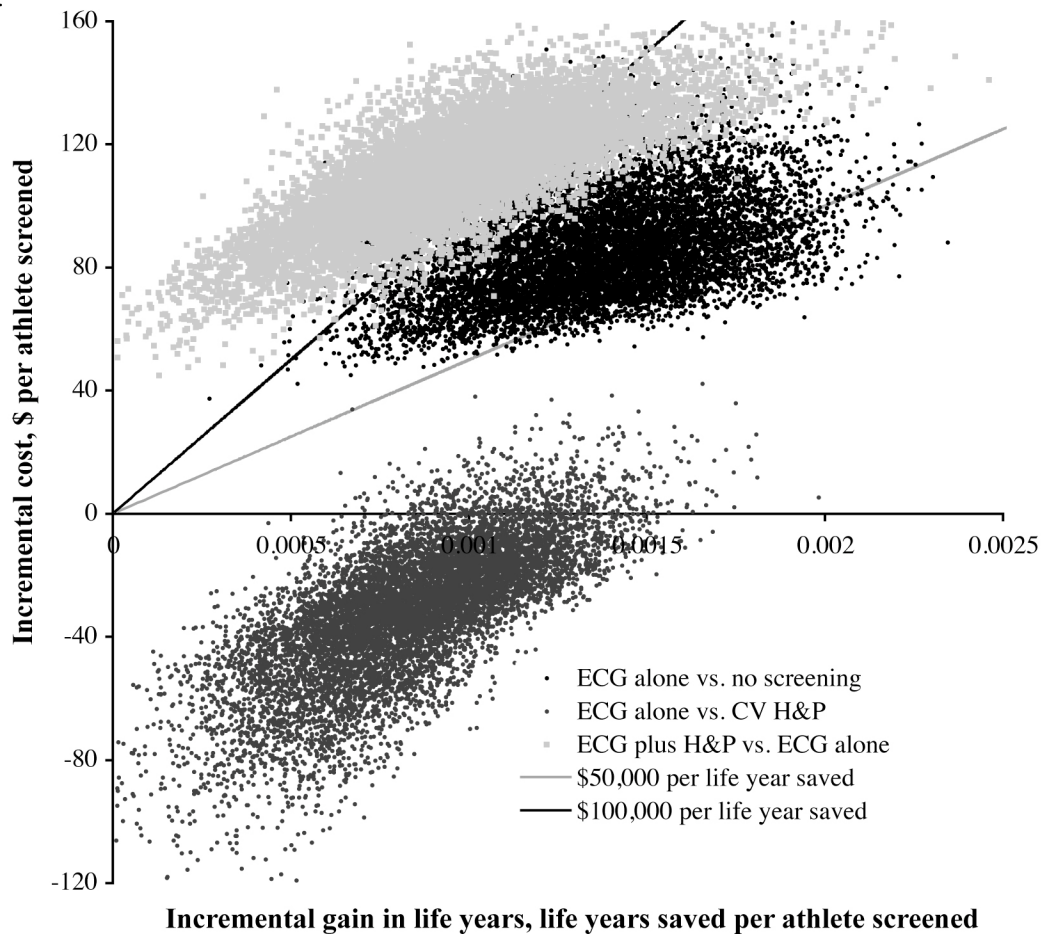

B.

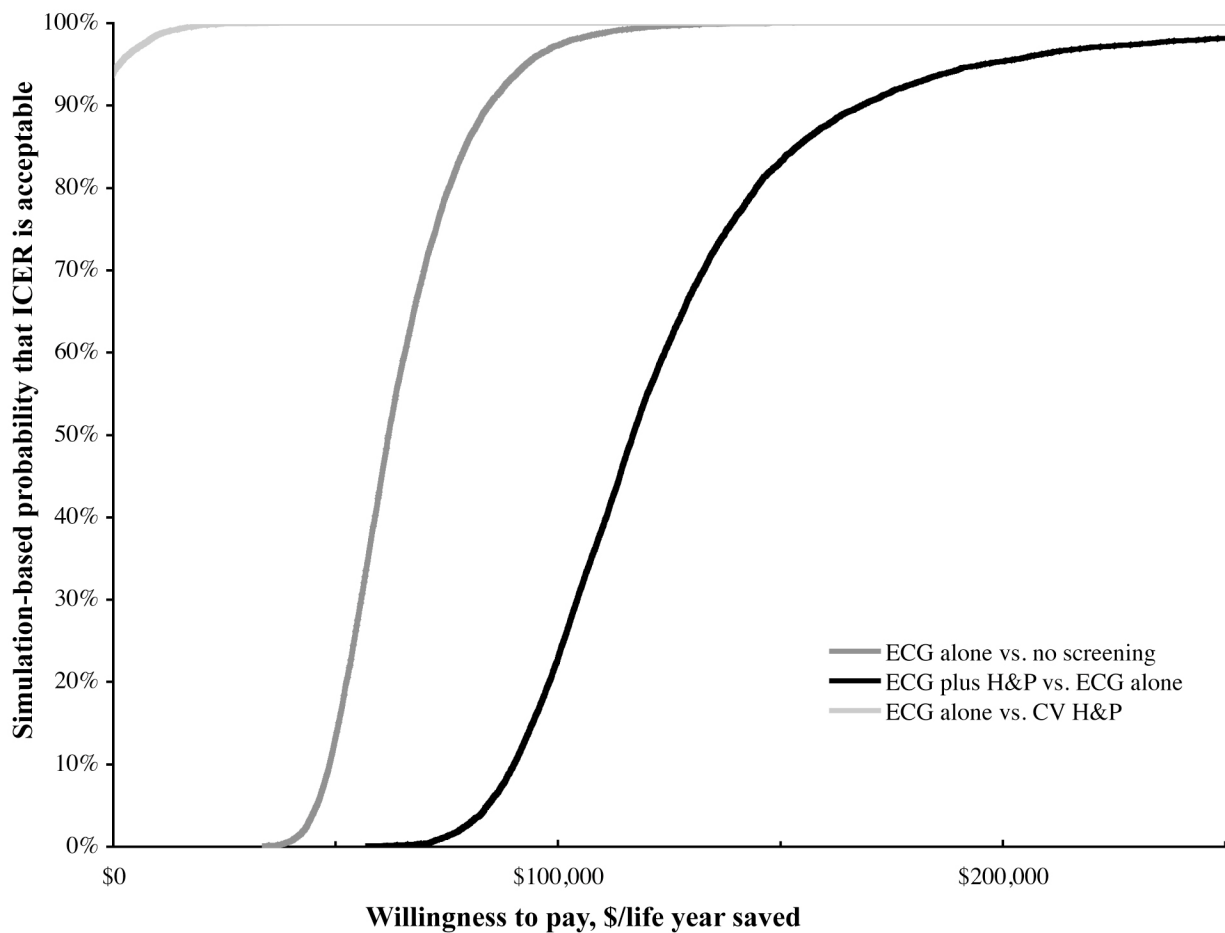

Appendix Figure 6.

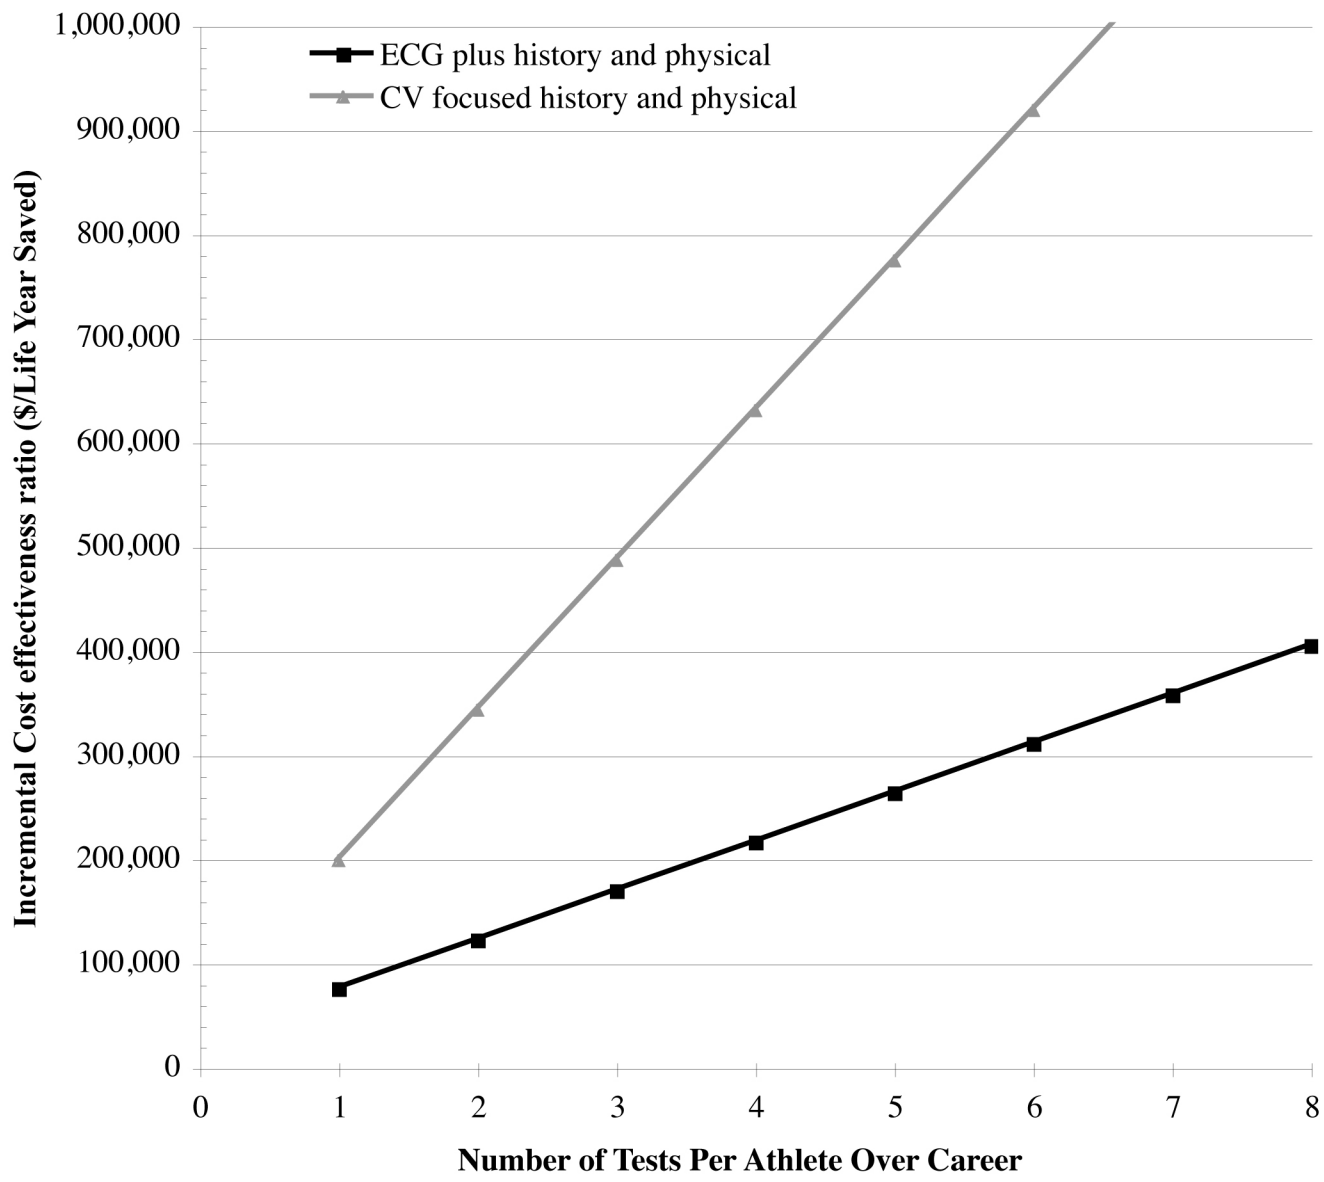

Appendix Figure 7.

A.

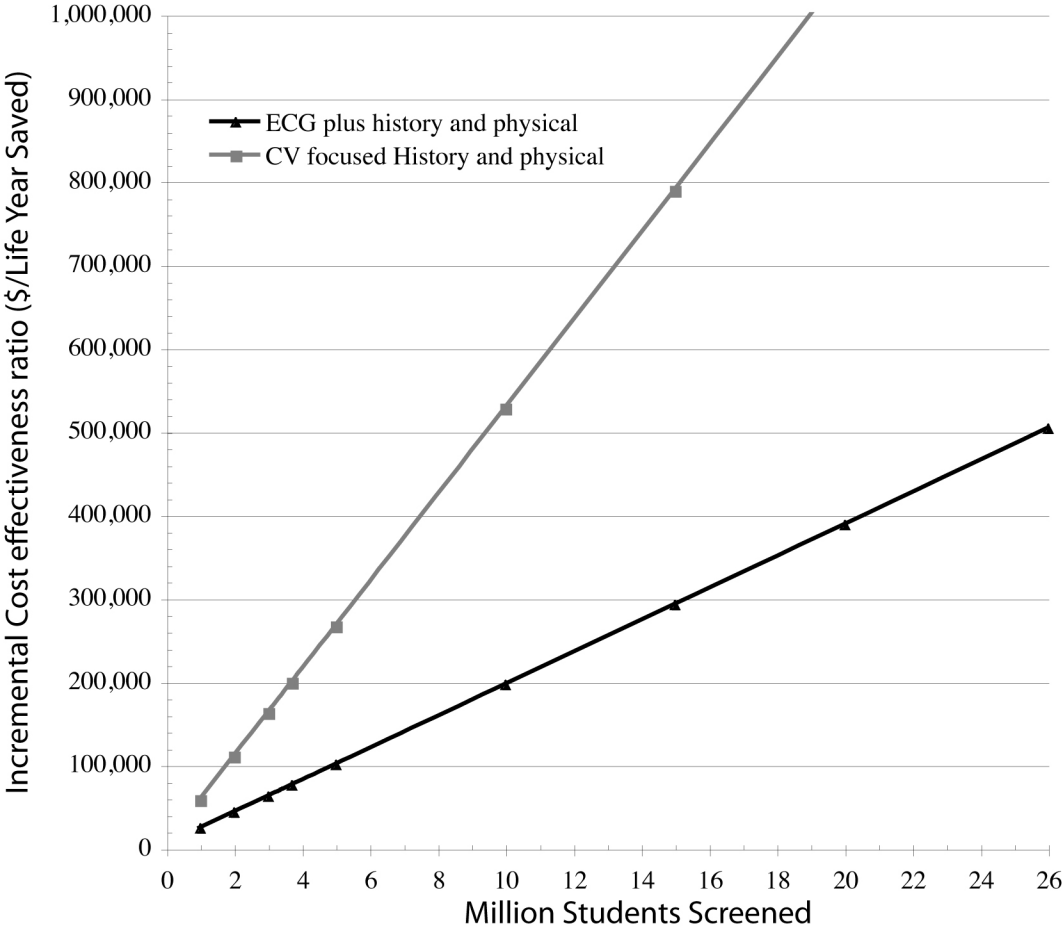

B.

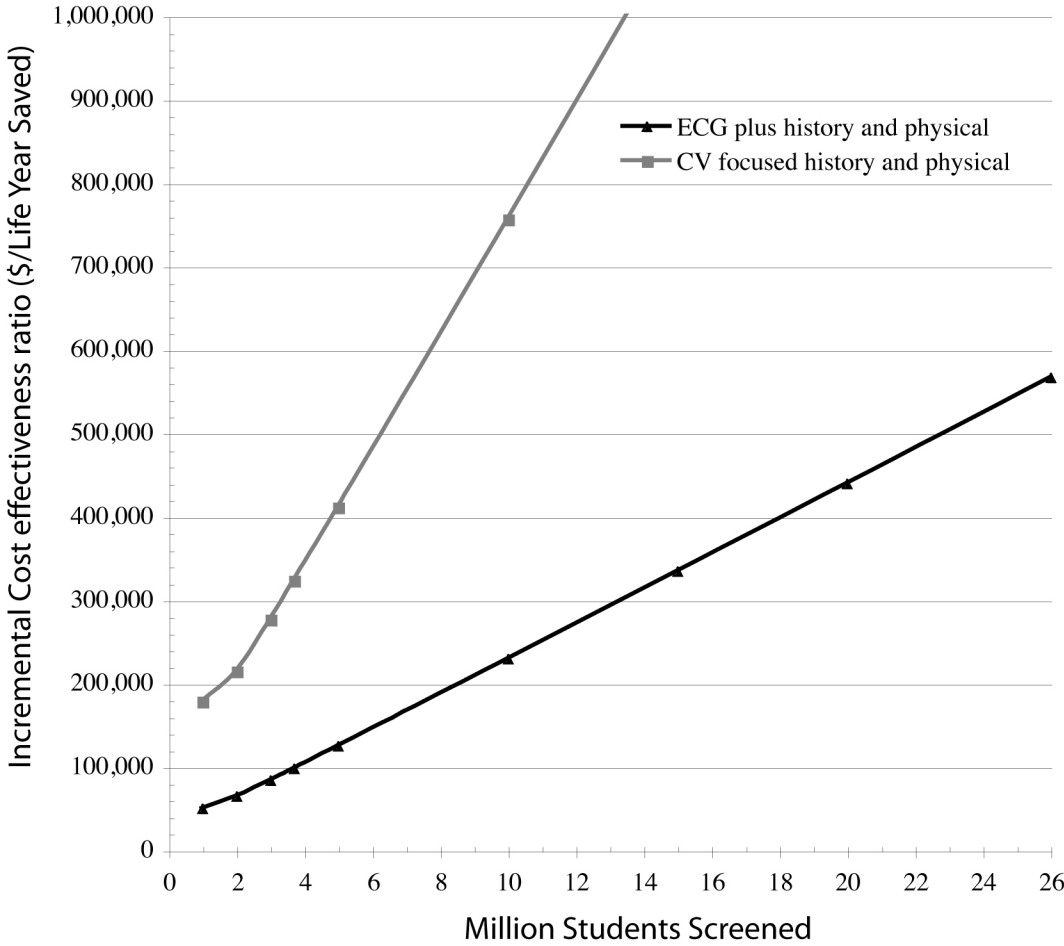

Supplement: NIHMS202108-supplement-Supplement.pdf [file NIHMS202108-supplement-Supplement.pdf]
